# Supplementary material for: Technology Acceptance of a Machine Learning Algorithm Predicting Delirium in a Clinical Setting: a Mixed-Methods Study
Source: PubMed Central journal article supplement (PMC7921052; doi:10.1007/s10916-021-01727-6), 2021-03-01
Supplement: 10916_2021_1727_MOESM1_ESM.pdf [file 10916_2021_1727_MOESM1_ESM.pdf]

## SUPPLEMENTARY FILE

Bitte markieren Sie für folgende Aussagen jene Kategorie, die am besten auf Sie zutrifft.

|                                                                                             | <b>Trifft<br/>nicht zu</b> | <b>Trifft<br/>wenig<br/>zu</b> | <b>Teils,<br/>teils</b>  | <b>Trifft<br/>eher<br/>zu</b> | <b>Trifft<br/>sehr zu</b> |
|---------------------------------------------------------------------------------------------|----------------------------|--------------------------------|--------------------------|-------------------------------|---------------------------|
| Der Zweck des Tools war klar und verständlich.                                              | <input type="checkbox"/>   | <input type="checkbox"/>       | <input type="checkbox"/> | <input type="checkbox"/>      | <input type="checkbox"/>  |
| Das Tool ist nützlich für meine Arbeit.                                                     | <input type="checkbox"/>   | <input type="checkbox"/>       | <input type="checkbox"/> | <input type="checkbox"/>      | <input type="checkbox"/>  |
| Ich war zu Beginn des Projekts ausreichend vorbereitet um das Tool verwenden zu können.     | <input type="checkbox"/>   | <input type="checkbox"/>       | <input type="checkbox"/> | <input type="checkbox"/>      | <input type="checkbox"/>  |
| Ich glaube, dass das Tool eine sinnvolle Unterstützung in der Delir-Prophylaxe ist.         | <input type="checkbox"/>   | <input type="checkbox"/>       | <input type="checkbox"/> | <input type="checkbox"/>      | <input type="checkbox"/>  |
| Durch das Tool stehen mir zusätzliche Informationen zur Verfügung.                          | <input type="checkbox"/>   | <input type="checkbox"/>       | <input type="checkbox"/> | <input type="checkbox"/>      | <input type="checkbox"/>  |
| Das Tool war schwierig zu bedienen.                                                         | <input type="checkbox"/>   | <input type="checkbox"/>       | <input type="checkbox"/> | <input type="checkbox"/>      | <input type="checkbox"/>  |
| Ich konnte die Verwendung des Tools gut in meinen klinischen Alltag integrieren.            | <input type="checkbox"/>   | <input type="checkbox"/>       | <input type="checkbox"/> | <input type="checkbox"/>      | <input type="checkbox"/>  |
| Durch das Tool ist meine Arbeitsbelastung gestiegen.                                        | <input type="checkbox"/>   | <input type="checkbox"/>       | <input type="checkbox"/> | <input type="checkbox"/>      | <input type="checkbox"/>  |
| Ich habe den Output des Tools in meine klinischen Entscheidungen miteinbezogen.             | <input type="checkbox"/>   | <input type="checkbox"/>       | <input type="checkbox"/> | <input type="checkbox"/>      | <input type="checkbox"/>  |
| Ich glaube, dass mithilfe des Tools ein Delir frühzeitig erkannt werden kann.               | <input type="checkbox"/>   | <input type="checkbox"/>       | <input type="checkbox"/> | <input type="checkbox"/>      | <input type="checkbox"/>  |
| Die angezeigten Informationen zu den einzelnen Patienten waren verständlich.                | <input type="checkbox"/>   | <input type="checkbox"/>       | <input type="checkbox"/> | <input type="checkbox"/>      | <input type="checkbox"/>  |
| In der täglichen Routine werden viele Delir-Fälle erst spät erkannt.                        | <input type="checkbox"/>   | <input type="checkbox"/>       | <input type="checkbox"/> | <input type="checkbox"/>      | <input type="checkbox"/>  |
| Ich habe das Tool regelmäßig verwendet.                                                     | <input type="checkbox"/>   | <input type="checkbox"/>       | <input type="checkbox"/> | <input type="checkbox"/>      | <input type="checkbox"/>  |
| Wie oft haben Sie das Delir-Prognose Tool verwendet (Ampel-Hinweis und/oder Detailanzeige)? |                            |                                |                          |                               |                           |
| ca. _____ Mal pro Monat                                                                     |                            |                                |                          |                               |                           |
|                                                                                             | <b>Sehr<br/>selten</b>     | <b>Selten</b>                  | <b>Manch-<br/>mal</b>    | <b>Häufig</b>                 | <b>Sehr<br/>häufig</b>    |
| Wie häufig stimmte das berechnete Delir-Risiko mit Ihrer eigenen Einschätzung überein?      | <input type="checkbox"/>   | <input type="checkbox"/>       | <input type="checkbox"/> | <input type="checkbox"/>      | <input type="checkbox"/>  |
| Wie oft schätzten Sie selbst das Risiko höher als vom Tool angezeigt?                       | <input type="checkbox"/>   | <input type="checkbox"/>       | <input type="checkbox"/> | <input type="checkbox"/>      | <input type="checkbox"/>  |

Sonstige Kommentare/Anmerkungen:

**Vielen Dank für Ihre Teilnahme!**

Supplementary Fig. S1a. German version of the technology acceptance questionnaire used for quantitative assessment.

Please select for each statement the category which fits best for you.

|                                                                                               | <b>Strongly disagree</b>  | <b>Disagree</b>          | <b>Neither agree, nor disagree</b> | <b>Agree</b>             | <b>Strongly agree</b>    |
|-----------------------------------------------------------------------------------------------|---------------------------|--------------------------|------------------------------------|--------------------------|--------------------------|
| The purpose of the application was clear and understandable.                                  | <input type="checkbox"/>  | <input type="checkbox"/> | <input type="checkbox"/>           | <input type="checkbox"/> | <input type="checkbox"/> |
| The application is useful for my work.                                                        | <input type="checkbox"/>  | <input type="checkbox"/> | <input type="checkbox"/>           | <input type="checkbox"/> | <input type="checkbox"/> |
| At time of implementation I was sufficiently prepared to use the application.                 | <input type="checkbox"/>  | <input type="checkbox"/> | <input type="checkbox"/>           | <input type="checkbox"/> | <input type="checkbox"/> |
| I believe that the application is a useful support to prevent delirium.                       | <input type="checkbox"/>  | <input type="checkbox"/> | <input type="checkbox"/>           | <input type="checkbox"/> | <input type="checkbox"/> |
| The application provides me with additional information.                                      | <input type="checkbox"/>  | <input type="checkbox"/> | <input type="checkbox"/>           | <input type="checkbox"/> | <input type="checkbox"/> |
| The application was difficult to use.*                                                        | <input type="checkbox"/>  | <input type="checkbox"/> | <input type="checkbox"/>           | <input type="checkbox"/> | <input type="checkbox"/> |
| I successfully integrated the application into my clinical routine.                           | <input type="checkbox"/>  | <input type="checkbox"/> | <input type="checkbox"/>           | <input type="checkbox"/> | <input type="checkbox"/> |
| The application has increased my workload.*                                                   | <input type="checkbox"/>  | <input type="checkbox"/> | <input type="checkbox"/>           | <input type="checkbox"/> | <input type="checkbox"/> |
| I considered the output of the application in my clinical decisions.                          | <input type="checkbox"/>  | <input type="checkbox"/> | <input type="checkbox"/>           | <input type="checkbox"/> | <input type="checkbox"/> |
| I believe that the application can be used to detect delirium at an early stage.              | <input type="checkbox"/>  | <input type="checkbox"/> | <input type="checkbox"/>           | <input type="checkbox"/> | <input type="checkbox"/> |
| The information displayed on the individual patients was understandable.                      | <input type="checkbox"/>  | <input type="checkbox"/> | <input type="checkbox"/>           | <input type="checkbox"/> | <input type="checkbox"/> |
| In clinical routine, many cases of delirium are being detected only late.                     | <input type="checkbox"/>  | <input type="checkbox"/> | <input type="checkbox"/>           | <input type="checkbox"/> | <input type="checkbox"/> |
| I have been using the application regularly.                                                  | <input type="checkbox"/>  | <input type="checkbox"/> | <input type="checkbox"/>           | <input type="checkbox"/> | <input type="checkbox"/> |
| How often did you use the delirium prediction application?<br>(Symbol in HIS and/or Web App?) |                           |                          |                                    |                          |                          |
|                                                                                               | around __ times per month |                          |                                    |                          |                          |
|                                                                                               | <b>Very Rarely</b>        | <b>Rarely</b>            | <b>Sometimes</b>                   | <b>Frequently</b>        | <b>Very frequently</b>   |
| How often did the presented delirium risk match your own risk estimation?                     | <input type="checkbox"/>  | <input type="checkbox"/> | <input type="checkbox"/>           | <input type="checkbox"/> | <input type="checkbox"/> |
| How often did you estimate the risk to be higher than predicted by the application?           | <input type="checkbox"/>  | <input type="checkbox"/> | <input type="checkbox"/>           | <input type="checkbox"/> | <input type="checkbox"/> |

Comments:

**Thank you for your participation!**

Supplementary Fig. S1b. Forward translated version of the technology acceptance questionnaire in English. The two items marked with asterisk were recoded for analysis later.

Supplementary Table S2. Internal consistency for the TAM factors used in the questionnaire. 95 % confidence intervals (CI) of Cronbach's alpha were calculated with the *ltm* package in R using boosting methods.

| TAM factor            | Items (n) | Cronbach's alpha |          |          |
|-----------------------|-----------|------------------|----------|----------|
|                       |           | alpha            | Lower CI | Upper CI |
| Perceived usefulness  | 5         | 0.76             | 0.650    | 0.837    |
| Perceived ease of use | 6         | 0.75             | 0.604    | 0.842    |
| Output quality        | 2         | 0.66             | 0.070    | 0.876    |
| Actual system use     | 2         | 0.85             | 0.743    | 0.918    |
